# Supplementary material for: Experimental Challenges for Reduced Genomes: The Cell Model Escherichia coli
Source: PubMed Central journal article supplement (PMC7022904; doi:10.3390/microorganisms8010003), 2019-12-18
Supplement: microorganisms-08-00003-s001.pdf [file microorganisms-08-00003-s001.pdf]

# Experimental Challenges for Reduced Genomes: The Cell Model *Escherichia coli*

Masaomi Kurokawa and Bei-Wen Ying

**Table S1. Growth properties and culture conditions of genome-reduced *E. coli* strains.** Strains and Genome del. indicate the names of the genome-reduced *E. coli* strains used in the original papers and the deleted length of the genomic sequences, respectively. The percentages of the reduced genome sizes are noted in the brackets. Growth rate and Growth max. represent the changes in the growth rates and in the maximal OD caused by the genome reduction, respectively. The ratios of growth changes are indicated, if applicable. The conditions for cell culture are described in Media and Culture vol., which indicate the medium compositions and the volumes, respectively. Refs represents the reference numbers of the original studies cited in the main text. n.d., no data.

|         | Genome del.      | Growth rate     | Growth max.  | Media                                                                           | Culture vol.                 | Refs. |
|---------|------------------|-----------------|--------------|---------------------------------------------------------------------------------|------------------------------|-------|
| MGF-01  | 1.03 Mb (22%)    | Equivalent      | Higher, 150% | M9 with 10 mg/L FeSO <sub>4</sub> , 20 g/L CaCO <sub>3</sub> and 10 g/L glucose | 20 mL, flask                 | [53]  |
|         |                  | Decreased, 53%  | Lower, 82%   | M63                                                                             | 200 μL, 96-well microplate   | [7]   |
|         |                  | Decreased, 83%  | Lower, 96%   | M63 with 0.02 mM Tyr and 0.05 mM 19 amino acids                                 | 200 μL, 96-well microplate   | [7]   |
|         |                  | Decreased, 92%  | Lower, 92%   | LB                                                                              | 200 μL, 96-well microplate   | [7]   |
| DGF-298 | 1.67 Mb (35.8%)  | Increased       | Higher       | CSL                                                                             | 800 mL in 2-L jar fermenter  | [51]  |
|         |                  | Increased       | Higher       | CSL                                                                             | 800 mL in 2-L jar fermenter  | [51]  |
| MDS12   | 376.2 kb (8.1%)  | Equivalent      | Higher, 110% | LB                                                                              | 100 mL                       | [58]  |
|         |                  | Equivalent      | Higher, 110% | M9 with glucose and 0.5% casamino acids                                         | 100 mL                       | [58]  |
|         |                  | Equivalent      | Higher, 110% | M9 with glucose                                                                 | 100 mL                       | [58]  |
| MDS41   | 663.6 kb (14.3%) | Equivalent      | n.d.         | minimal medium                                                                  | 1.5 L in 2-L jar fermenter   | [59]  |
| MDS42   | 663.3 kb (14.3%) | Equivalent      | n.d.         | MOPS minimal medium                                                             | 50 mL in 250-mL flask        | [59]  |
|         |                  | Equivalent      | n.d.         | LB                                                                              | 50 mL in 250-mL flask        | [59]  |
|         |                  | Equivalent      | n.d.         | Defined Rich medium                                                             | 50 mL in 250-mL flask        | [59]  |
|         |                  | Decreased, 75%  | n.d.         | M9 with 1 mM glucose and 0.2 % casamino acids                                   | microplate                   | [57]  |
| MDS69   | 939.5 kb (20.3%) | Decreased, 83%  | n.d.         | LB + 15% DMSO                                                                   | 50 μL in 384-well microplate | [60]  |
| Δ16     | 1.38 Mb (29.7%)  | Decreased, 58%  | n.d.         | Antibiotic Medium 3                                                             | n.d.                         | [8]   |
| MS56    | 1068 kb (23%)    | Increased, 160% | n.d.         | minimal medium (no details)                                                     | n.d.                         | [65]  |
|         |                  | Equivalent      | n.d.         | LB                                                                              | n.d.                         | [65]  |
|         |                  | Decreased, 37%  | n.d.         | M9 with glucose                                                                 | n.d.                         | [55]  |
|         |                  | Decreased, 87%  | n.d.         | LB                                                                              | n.d.                         | [55]  |
| CDΔ3456 | 313.1 kb (6.8%)  | Equivalent      | n.d.         | LB                                                                              | n.d.                         | [66]  |

**Table S2. Media used for growth assays of the reduced genomes.** The compositions of six media (in bold) used to test the growth of the genome-reduced *E. coli* strains are summarized. References indicates the reference numbers of the original papers cited in the main text. \*, 1M MgSO<sub>4</sub>; \*\*, MgSO<sub>4</sub> · 7H<sub>2</sub>O.

|                                                                  | <b>M9 buffer</b> |       | <b>M9</b> |     | <b>M63</b> |    | <b>Antibiotic Medium 3</b> |     | <b>CSL</b> |       | <b>MOPS MM</b> |    |
|------------------------------------------------------------------|------------------|-------|-----------|-----|------------|----|----------------------------|-----|------------|-------|----------------|----|
| Na <sub>2</sub> HPO <sub>4</sub>                                 | 6                | g/L   | 47.5      | mM  |            |    |                            |     |            |       |                |    |
| K <sub>2</sub> HPO <sub>4</sub>                                  |                  |       |           |     | 62         | mM | 3.68                       | g/L | 23.4       | g/L   | 1.32           | mM |
| KH <sub>2</sub> PO <sub>4</sub>                                  | 3                | g/L   | 22.04     | mM  | 39         | mM | 1.32                       | g/L |            |       |                |    |
| NaCl                                                             | 5                | g/L   | 8.56      | mM  |            |    | 3.5                        | g/L | 1.6        | g/L   | 50             | mM |
| NH <sub>4</sub> Cl                                               |                  |       | 18.7      | mM  |            |    |                            |     |            |       | 9.52           | mM |
| CaCl <sub>2</sub>                                                |                  |       | 0.1       | mM  |            |    |                            |     |            |       | 0.5            | μM |
| CoCl <sub>2</sub>                                                |                  |       |           |     |            |    |                            |     |            |       | 0.3            | μM |
| MnCl <sub>2</sub>                                                |                  |       |           |     |            |    |                            |     |            |       | 0.8            | μM |
| MgCl <sub>2</sub>                                                |                  |       |           |     |            |    |                            |     |            |       | 0.523          | mM |
| MgSO <sub>4</sub>                                                | 1                | mL/L* | 2         | mM  | 0.2        | mM |                            |     | 1.67       | g/L** |                |    |
| FeSO <sub>4</sub>                                                | 10               | mg/L  |           |     | 1.8        | μM |                            |     |            |       | 0.01           | mM |
| (NH <sub>4</sub> ) <sub>2</sub> SO <sub>4</sub>                  |                  |       |           |     | 15         | mM |                            |     | 9.4        | g/L   |                |    |
| K <sub>2</sub> SO <sub>4</sub>                                   |                  |       |           |     |            |    |                            |     |            |       | 0.276          | mM |
| CuSO <sub>4</sub>                                                |                  |       |           |     |            |    |                            |     |            |       | 0.1            | μM |
| ZnSO <sub>4</sub>                                                |                  |       |           |     |            |    |                            |     |            |       | 0.4            | μM |
| (NH <sub>4</sub> ) <sub>6</sub> (MO <sub>7</sub> ) <sub>24</sub> |                  |       |           |     |            |    |                            |     |            |       | 0.03           | μM |
| thiamine-HCl                                                     |                  |       |           |     | 15         | μM |                            |     | 7.8        | mg/L  |                |    |
| CaCO <sub>3</sub>                                                | 20               | g/L   |           |     |            |    |                            |     |            |       |                |    |
| H <sub>3</sub> BO <sub>3</sub>                                   |                  |       |           |     |            |    |                            |     |            |       | 4              | μM |
| glucose                                                          | 10               | g/L   | 2         | g/L | 22         | mM | 1                          | g/L | 30         | g/L   |                |    |
| beef extract                                                     |                  |       |           |     |            |    | 1.5                        | g/L |            |       |                |    |
| yeast extract                                                    |                  |       |           |     |            |    | 1.5                        | g/L |            |       |                |    |
| peptone                                                          |                  |       |           |     |            |    | 5                          | g/L |            |       |                |    |
| corn steep liquor                                                |                  |       |           |     |            |    |                            |     | 31.3       | mL/L  |                |    |
| soy peptone                                                      |                  |       |           |     |            |    |                            |     | 7.8        | g/L   |                |    |
| nicotinic acid                                                   |                  |       |           |     |            |    |                            |     | 7.8        | mg/L  |                |    |
| threonine                                                        |                  |       |           |     |            |    |                            |     | 31.2       | mg/L  |                |    |
| tryptophan                                                       |                  |       |           |     |            |    |                            |     | 31.2       | mg/L  |                |    |
| leucine                                                          |                  |       |           |     |            |    |                            |     | 31.2       | mg/L  |                |    |
| MOPS                                                             |                  |       |           |     |            |    |                            |     |            |       | 40             | mM |
| Tricine                                                          |                  |       |           |     |            |    |                            |     |            |       | 4              | mM |
| References                                                       | [52, 53, 58]     |       | [55]      |     | [7, 54]    |    | [8]                        |     | [51]       |       | [59, 61]       |    |
